# Supplementary material
Source: publisher figshare collection journal article supplement (https://acs.figshare.com/ndownloader/files/4163503)
Supplement: Supplementary file 1 [file 4163503]

Supporting Information Available

This information is available free of charge via the Internet: <http://pubs.acs.org/>

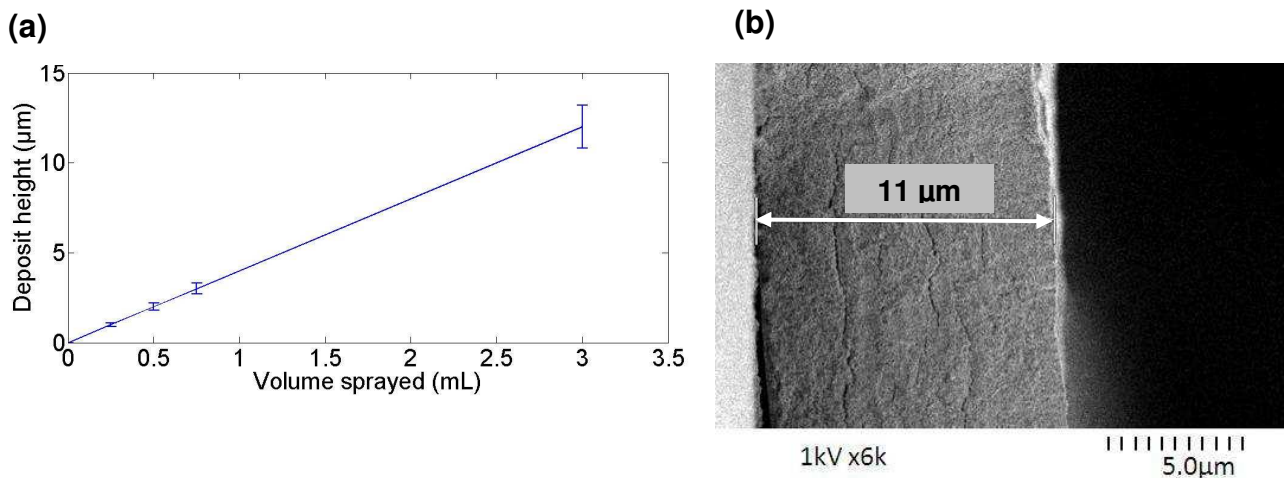

**Figure S1.** (a) Thickness of the deposit as a function of the amount of colloidal solution sprayed onto the substrate. (b) SEM cross-sectional view of TiO<sub>2</sub> thick film spray deposited with cracks separated by ~3 μm.

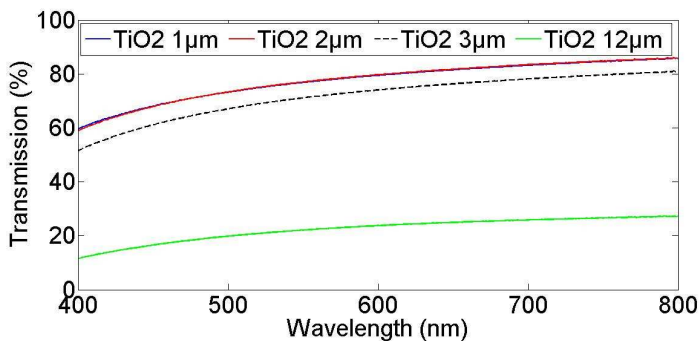

**Figure S2.** Transmission measurements on TiO<sub>2</sub> films of various thicknesses ( $e=1-2-3-12\ \mu\text{m}$ ). One and two micrometers thick TiO<sub>2</sub> films have the same transmission properties (red and blue solid lines) whereas the three micron one (black dashed line) presents a lower one due to crack in the volume. By extension, the thicker one has more cracks and is more scattering (green solid line).
